# Supplementary material for: Determining the impact of smoking point of sale legislation among youth (Display) study: a protocol for an evaluation of public health policy
Source: PubMed Central journal article supplement (PMC4004271; doi:10.1186/1471-2458-14-251), 2014-03-14
Supplement: 1471-2458-14-251-S1.pdf [file 1471-2458-14-251-S1.pdf]

**Table 1 Repeat cross-sectional school surveys with embedded cohorts**

| Year of Survey | S1 | S2 | S3 | S4 | S5 | S6 | Phase of Legislation                                             |
|----------------|----|----|----|----|----|----|------------------------------------------------------------------|
| 2013           |    | ■  |    | ■  |    |    | Baseline pre-implementation in large supermarkets                |
| 2014           |    | ■  |    | ■  |    |    | Post-implementation in large supermarkets (partial ban POS)      |
| 2015           | ■  | ■  | ■  | ■  | ■  | ■  | Post-implementation in large supermarkets (partial ban POS)      |
|                |    |    |    |    |    |    | Pre-implementation smaller retailers                             |
| 2016           | ■  | ■  | ■  | ■  | ■  | ■  | Post-implementation in smaller retailers (comprehensive ban POS) |
| 2017           |    | ■  | ■  | ■  | ■  | ■  | Post-implementation in smaller retailers (comprehensive ban POS) |
